# Supplementary figures and images for: Transmissibility and control of tuberculosis: a modeling study based on four outbreaks in China
Source: Research Square preprint supplement (doi:10.21203/rs.3.rs-1546915/v1), 2022-04-25

**Fig S1.** The epidemic curves of 4 tuberculosis outbreak events in Changsha city, Hunan province.


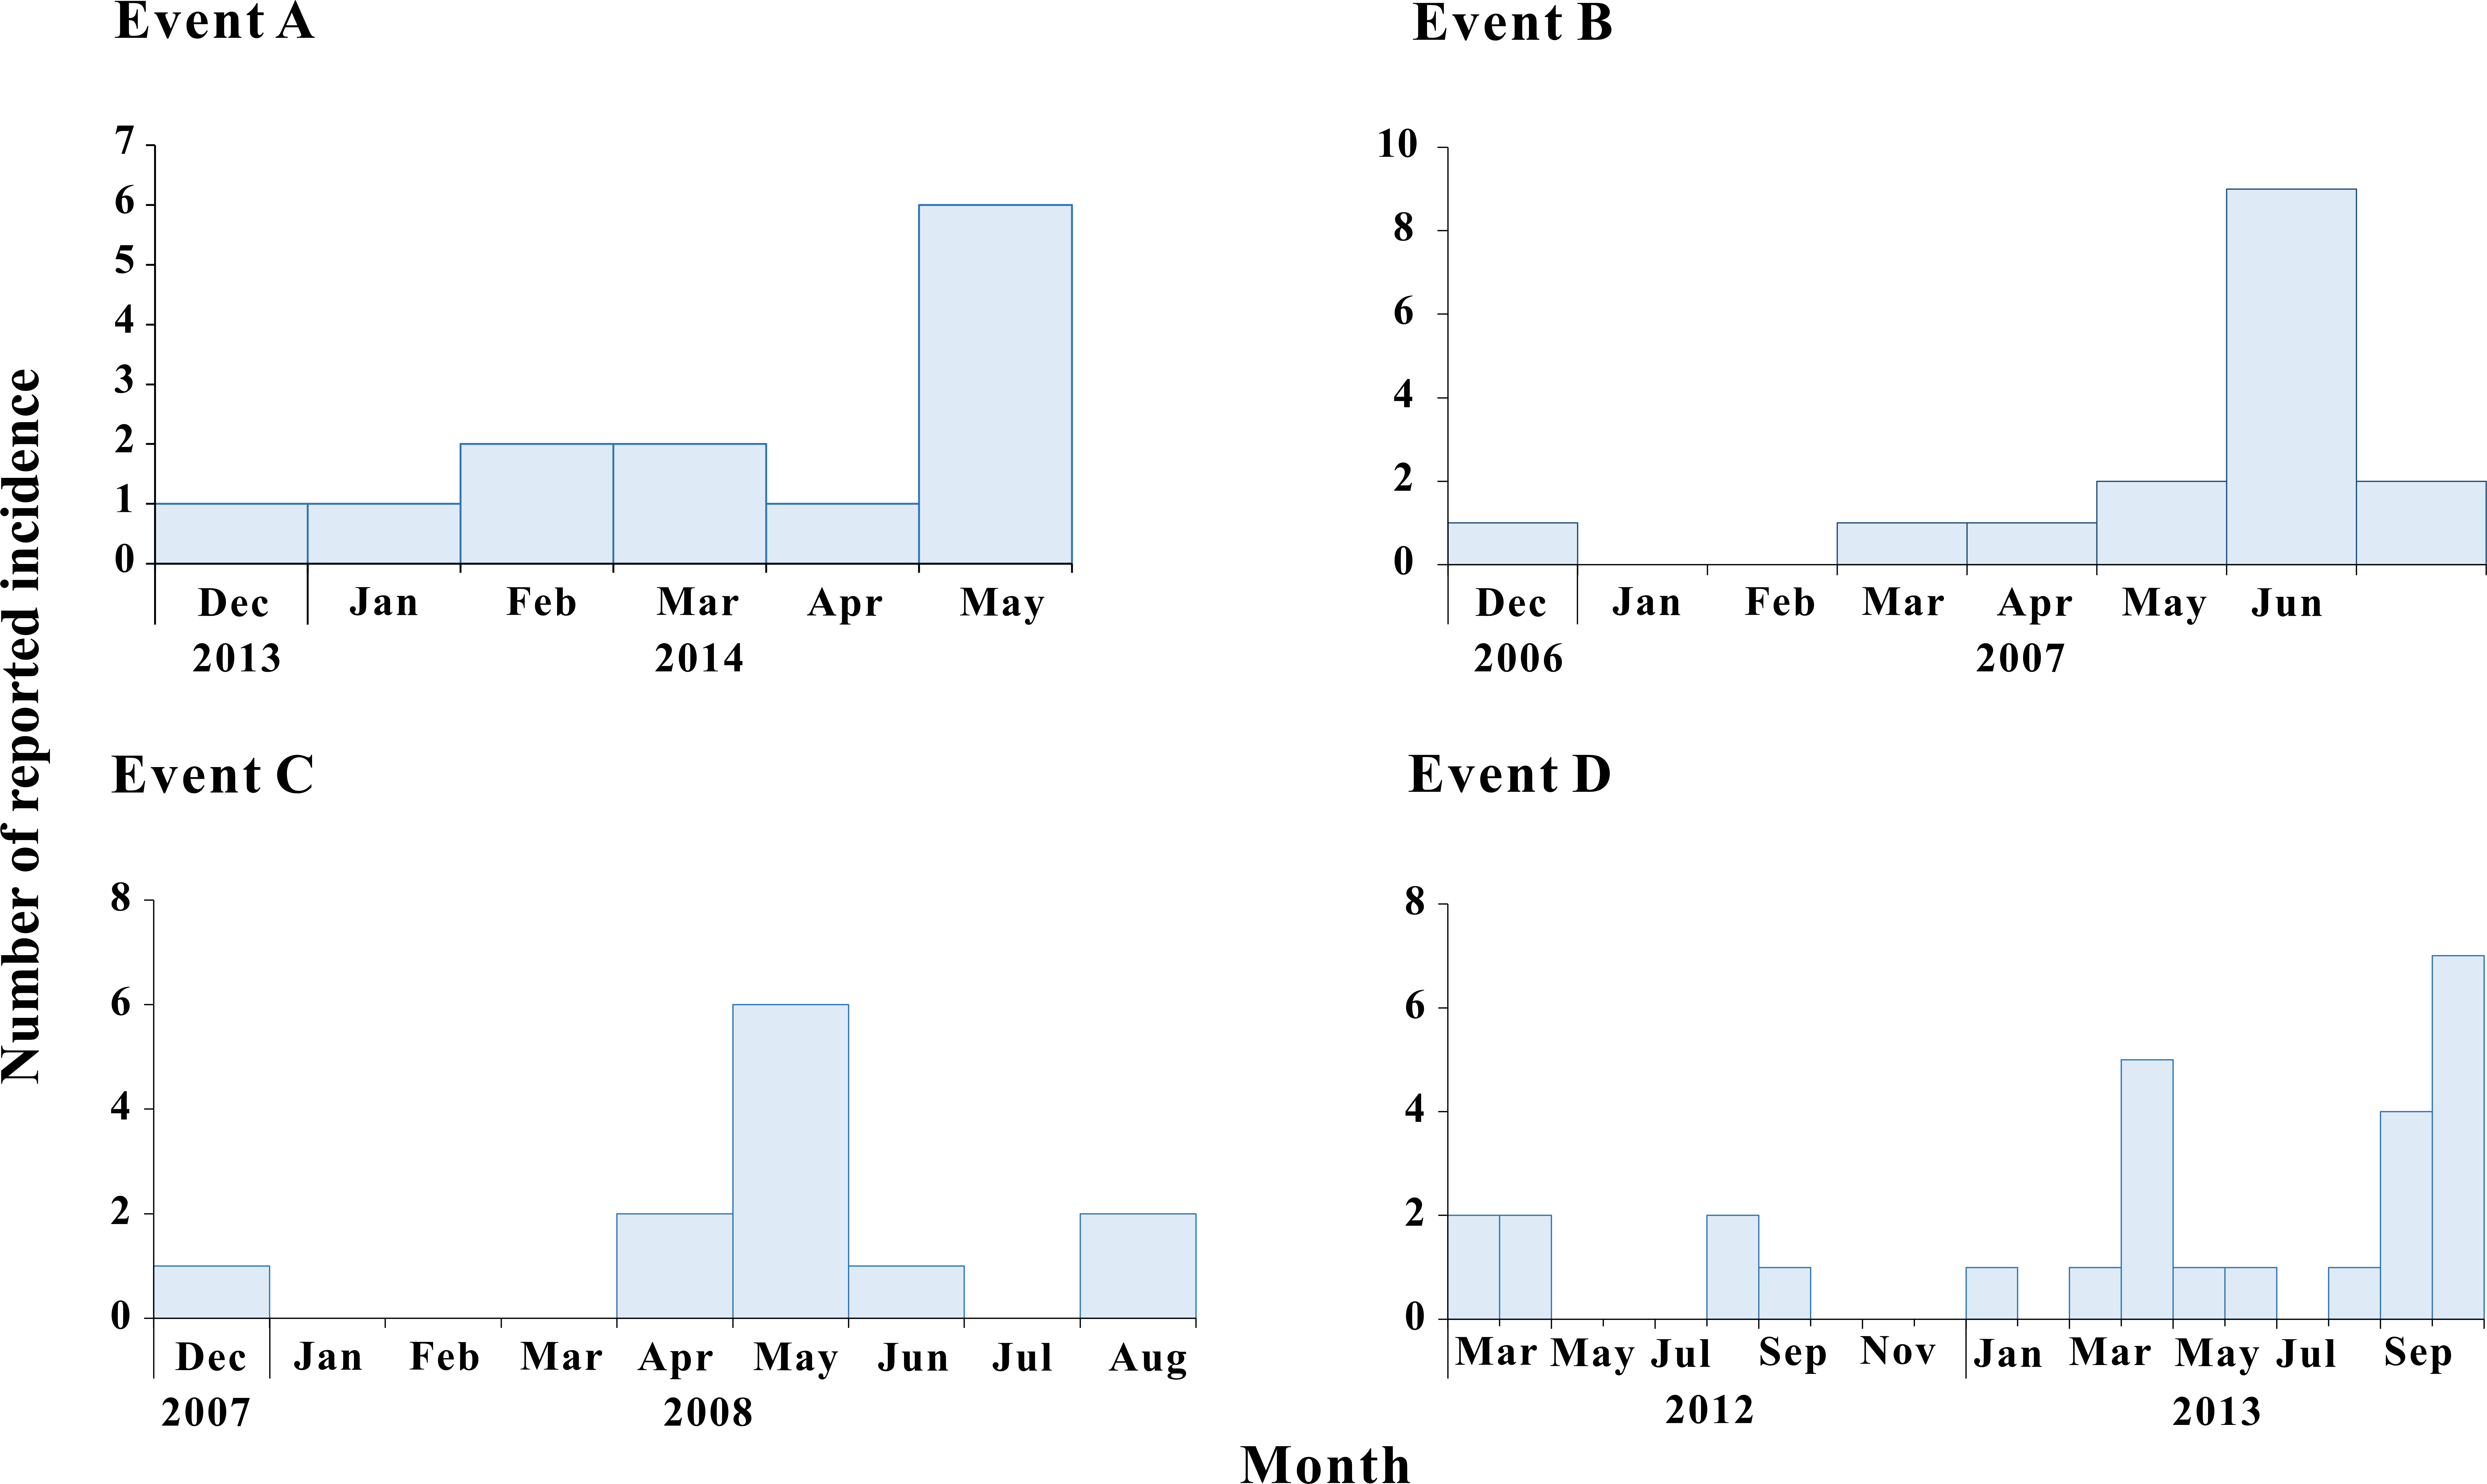

Supplement: Supplementary file 1 [file 2ad7d710316d1f6e5287b6e6.docx]
